# Supplementary material for: Risk of Recurrence in Uterine Leiomyoma with Bizarre Nuclei: a Systematic Review and Meta-Analysis
Source: PubMed Central journal article supplement — Geburtshilfe Frauenheilkd. 2021 Nov 4;81(11):1217–23. doi: 10.1055/a-1533-1651 (PMC8568503; doi:10.1055/a-1533-1651), 2021-11-04
Supplement: 10-1055-a-1533-1651-sup_gf.pdf [file 10-1055-a-1533-1651-sup_gf.pdf]

## Supplementary material

**Supplementary Figure S1.** Flow diagram of studies identified in the systematic review (Prisma template [Preferred Reporting Item for Systematic Reviews and Meta-analyses]).

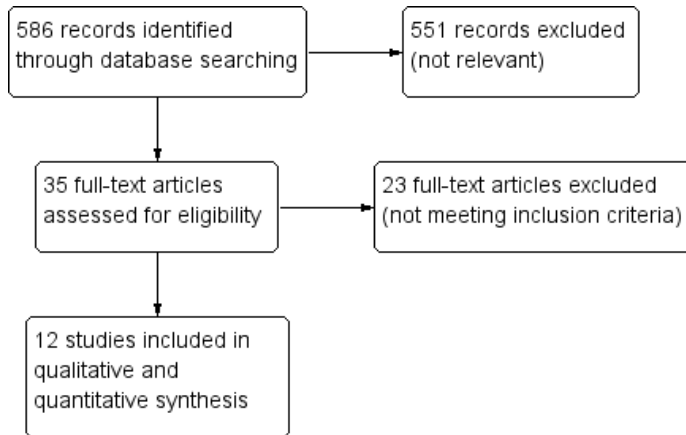

**Supplementary Figure S2.** Assessment of risk of bias. Summary of risk of bias for each study; Plus sign: low risk of bias; minus sign: high risk of bias; question mark: unclear risk of bias.

|                    | Risk of Bias      |            |                    |                 |
|--------------------|-------------------|------------|--------------------|-----------------|
|                    | Patient Selection | Index Test | Reference Standard | Flow and Timing |
| 1994 Bell          | +                 | +          | +                  | +               |
| 1997 Downes        | +                 | +          | +                  | +               |
| 2009 Sung          | +                 | +          | +                  | +               |
| 2013 Ly            | +                 | +          | +                  | ?               |
| 2014 Croce         | +                 | +          | +                  | +               |
| 2015 Liang         | +                 | +          | +                  | +               |
| 2016 Kalogiannidis | +                 | +          | +                  | +               |
| 2016 Ubago         | +                 | +          | +                  | +               |
| 2017 Chow          | ?                 | +          | +                  | +               |
| 2017 Bennett       | +                 | +          | +                  | +               |
| 2018 Gregova       | +                 | +          | +                  | +               |
| 2018 Kefeli        | +                 | +          | +                  | +               |

● High    ? Unclear    + Low
